# Supplementary material for: Provenance of drinking water revealed through compliance sampling
Source: Royal Society of Chemistry journal article supplement (doi:10.1039/c8em00437d), 2019-01-01
Supplement: c8em00437d1.xlsx [file c8em00437d1.xlsx]

## Sheet: Supplementary Table 1
Supplementary Table 1: List of compliance and indicator parameters and sampling points
Requirement	Parameters	Concentration or value maximum	Units of measurement	Point of compliance
Directive	Acrylamide	0.1	µg/L	PS
Directive	Aldrin	0.03	µg/L	T OR SP
National	Aluminium	200	µgAl/L	T
Indicator	Ammonium	0.5	mgNH4/L	T
Directive	Antimony	5	µgSb/L	T OR SP*
Directive	Arsenic	10	µgAs/L	T OR SP*
Directive	Benzene	1	µg/L	T OR SP
Directive	Benzo(a)pyrene	0.01	µg/L	T
Directive	Boron	1	mgB/L	T OR SP
Directive	Bromate	10	µgBrO3/L	T OR SP
Directive	Cadmium	5	µgCd/L	T OR SP
Indicator	Chloride	250	mgCl/L	SP
Directive	Chromium	50	µgCr/L	T
Indicator	Clostridium perfringens	0	Number/100 mL	SP
National	Coliform bacteria	0	Number/100 mL	SR and WTW
Indicator	Coliform bacteria	0	Number/100 mL	T
Indicator	Colony counts	0	Number/mL at 22°C	T, SR and WTW
			Number/mL at 37°C
National	Colour	20	Mg/L Pt/Co	T
Indicator	Conductivity	2500	µS/cm at 20°C	SP
Directive	Copper	2	µgCu/L	T
Directive	Cyanide	50	µgCN/L	T OR SP
Directive	1,2-dichloroethane	3	µg/L	T OR SP
Directive	Dieldrin	0.03	µg/L	T OR SP
Directive	Enterococci	0	Number/100 mL	T
Directive	Epichlorohydrin	0.1	µg/L	PS
Directive	Escherichia coli	0	Number/100 mL	T
National	Escherichia coli	0	Number/100 mL	SR and WTW
Directive	Fluoride	1.5	mg/L	T OR SP
Directive	Heptachlor	0.03	µg/L	T OR SP
Directive	Heptachlor epoxide	0.03	µg/L	T OR SP
Indicator	Hydrogen ion	6.5-9.5	pH value	T
National	Iron	200	µgFe/L	T
Directive	Lead	10	µg/L	T
		25 up to 25 Dec 2013
National	Manganese	50	µgMn/L	T
Directive	Mercury	1	µgHg/L	T OR SP
Directive	Nickel	20	µgNi/L	T
Directive	Nitrate (ii)	50	mgNO3/L	T OR SP*
Directive	Nitrite (ii)	0.5	mgNO2/L	T
		0.1		WTW
National	Odour	<1 at 25°C	Dilution number	T
Directive	Other pesticides	0.1	µg/L	T OR SP
Directive	PAH (v)	0.5	µg/L	T
Directive	Selenium	10	µg/L	T OR SP*
National	Sodium	200	mgNa/L	T
Indicator	Sulphate	250	mgSO4/L	SP
National	Taste	<1 at 25°C	Dilution number	T
Directive	Tetra and trichloroethene (vi)	10	µg/L	T OR SP
National	Tetrachloromethane	3	µg/L	T OR SP
Indicator	Total indicative dose for radioactivity	0.1	mSv/year	SP
Indicator	Total organic carbon	No abnormal change	mgC/L	SP
Directive	Total pesticides (iv)	0.5	µg/L	T OR SP
Directive	Total THM (vii)	100	µg/L	T OR SP*
Indicator	Tritium	100	Bq/L	SP
National	Turbidity	4	NTU	T
Indicator	Turbidity	1	NTU	WTW
Directive	Vinyl chloride	0.5	µg/L	PS
PS – product specification, SR – service reservoir, T – customer’s tap, T or SP – customer’s tap can be replaced by authorised supply points which can be a blending point, service reservoir or WTW where no change in distribution system is anticipated, T or SP* – customer’s tap can be replaced by authorised supply point only if authorised by Secretary of State, WTW – Water treatment works
Notes:
i) The parametric value refers to the residual monomer concentration in the water as calculated according to specifications of the maximum release from the corresponding polymer in contact with the water.
ii) [nitrate]/50 + [nitrite]/3 < 1, where the square brackets signify the concentrations in mg/l for nitrate (NO3) and nitrite (NO2).The parametric value applies to each individual pesticide.
iii) "Pesticides: Total" means the sum of the concentrations of the individual pesticides detected and quantified in the monitoring procedure.
iv) The specified compounds are: - benzo(b)fluoranthene - benzo(k)fluoranthene - benzo(ghi)perylene - indeno(1,2,3-cd)pyrene.
i) The parametric value applies to the sum of the concentrations of the individual compounds detected and quantified in the monitoring process.
ii) The specified compounds are: - chloroform - bromoform dibromochloromethane - bromodichloromethane. The parametric value applies to the sum of the concentrations of the individual compounds detected and quantified in the monitoring process.
